# Supplementary material for: Centrally acting ACE inhibitor (cACEi) and angiotensin receptor blocker (cARB) use and cognitive dysfunction in patients with SLE
Source: PubMed Central journal article supplement — Lupus Sci Med. 2023 Jul 10;10(2):e000923. doi: 10.1136/lupus-2023-000923 (PMC10335417; doi:10.1136/lupus-2023-000923), 2023-07-10
Supplement: lupus-2023-000923supp001.pdf [file lupus-2023-000923supp001.pdf]

**Supplementary Table 1: American College of Rheumatology Neuropsychological Battery (ACR-NB)**

| Domain                                          | Test                                                                                        | Domain                                     | Test                                                                                                                                                                                                                |
|-------------------------------------------------|---------------------------------------------------------------------------------------------|--------------------------------------------|---------------------------------------------------------------------------------------------------------------------------------------------------------------------------------------------------------------------|
| <b>1. Manual motor speed</b>                    | Finger Tapping Test:<br>1. Dominant Hand<br>2. Non-Dominant Hand                            | <b>4. Language processing<sup>57</sup></b> | 1. COWAT<br>2. ANIMALS                                                                                                                                                                                              |
| <b>2. Simple Attention and Processing Speed</b> | 1. Trail A <sup>58</sup><br>2. Stroop colour naming<br>3. Stroop word reading <sup>59</sup> | <b>5. Learning and Memory</b>              | <i>Visuospatial<sup>60</sup>:</i><br>1. RCFT recall<br>2. RCFT Delay Recall<br>3. RCFT Recognition<br><br><i>Verbal<sup>61</sup>:</i><br>4. HVLTR delayed recall<br>5. HVLTR Recognition<br>6. HVLTR total recall   |
| <b>3. Visual-spatial Construction</b>           | 1. RCFT Copy <sup>60</sup>                                                                  | <b>6. Executive Functioning</b>            | 1. Stroop (interference score) <sup>59</sup><br>2. WAIS Letter-Number <sup>62</sup><br>3. WAIS-III Digit Symbol/SDMT <sup>63</sup><br>4. Trail B <sup>58</sup><br>5. Auditory consonant Trigrams test <sup>64</sup> |

RCFT: Rey-Osterrieth Complex Figure Test

COWAT: Controlled Oral Word Association Test

HVLTR: Hopkins Verbal Learning Test, revised

SDMT: Symbol Digit Modalities Test

WAIS-III: Wechsler Adult Intelligence Scale, 3rd ed.

Our battery is identical to the ACR recommended cognitive battery for adults with SLE<sup>23,65</sup>, except that the Hopkins Verbal Learning Test – Revised (HVLTR) was substituted for the California Verbal Learning Test (CVLT)<sup>25</sup> and the Trail Making Test part A<sup>58</sup> was added. The HVLTR is shorter and an easier test compared to CVLT which could have rendered our battery less sensitive than the original ACR-NB. However, the addition of Trails A to our battery helps to offset that as it adds overall sensitivity to the battery. In addition, the Montreal Cognitive Assessment (MoCA)<sup>66,67</sup> was administered, and the Revised North American Adult Reading Test can assess for estimated pre-morbid IQ.

**Supplementary Table 2: Baseline use of specific centrally acting angiotensin converting enzyme inhibitors (cACEi) and centrally-acting angiotensin receptor blockers (cARB)**

| <b>cACEi/cARB</b>   | <b>Number (%)</b> |
|---------------------|-------------------|
| Candesartan         | 7 (13%)           |
| Valsartan           | 1 (2%)            |
| Fosinopril          | 1 (2%)            |
| Irbesartan/Ramipril | 1 (2%)            |
| Lisinopril          | 1 (2%)            |
| Perindopril         | 4 (8%)            |
| Ramipril            | 37 (70%)          |
| Trandolapril        | 1 (2%)            |
| <b>Total</b>        | <b>53 (100%)</b>  |

**Supplementary Table 3: Equivalent dosing for centrally-acting angiotensin converting enzyme inhibitors (cACEi) and centrally-acting angiotensin receptor blockers (cARB)**

| <b>cACEi/cARB</b> | <b>Equivalent Dose (milligrams per day)</b> |
|-------------------|---------------------------------------------|
| Ramipril          | 2.5                                         |
| Captopril         | 50                                          |
| Fosinopril        | 10                                          |
| Lisinopril        | 10                                          |
| Perindopril       | 4                                           |
| Trandolapril      | 2                                           |
| Candesartan       | 8                                           |
| Valsartan         | 80                                          |

**Supplementary Table 4: Comparison of domain five (learning and memory) cognitive tests between treated (cACEi/cARB) and untreated participants**

| Cognitive test                   | cACEi/cARB   | No cACEi/cARB | p-value | Ramipril use | No Ramipril  | p-value |
|----------------------------------|--------------|---------------|---------|--------------|--------------|---------|
|                                  | use          | use           |         | Mean (SD)    | use          |         |
|                                  | Mean (SD)    | Mean (SD)     |         | Mean (SD)    | Mean (SD)    |         |
| <b>5.1 RCFT recall</b>           | -1.04 (1.25) | -0.812 (1.41) | 0.27    | -0.93 (1.25) | -0.84 (1.40) | 0.73    |
| <b>5.2 RCFT delay recall</b>     | -1.12 (1.27) | -0.77 (1.34)  | 0.09    | -0.91 (1.28) | -0.82 (1.34) | 0.72    |
| <b>5.3 RCFT recognition</b>      | -0.66 (1.07) | -0.48 (1.13)  | 0.31    | -0.52 (1.07) | -0.51 (1.13) | 0.97    |
| <b>5.4 HVLt-R delayed recall</b> | -0.95 (1.21) | -0.88 (1.13)  | 0.72    | -1.01 (1.19) | -0.88 (1.14) | 0.52    |
| <b>5.5 HVLt-R recognition</b>    | -0.68 (1.26) | -0.86 (1.32)  | 0.36    | -0.73 (1.31) | -0.84 (1.32) | 0.65    |
| <b>5.6 HVLt-R total recall</b>   | -0.79 (1.02) | -0.87 (0.93)  | 0.57    | -0.86 (0.96) | -0.86 (0.94) | 0.98    |

*RCFT: Rey-Osterrieth Complex Figure Test*

*COWAT: Controlled Oral Word Association Test*

*HVLt-R: Hopkins Verbal Learning Test, revised*

**Supplementary Table 5: Comparison of cognitive dysfunction (CD) between Ramipril treated (cACEi/cARB) and untreated participants**

| <b>VARIABLE</b>                                        | <b>No CD<br/>n=184 (61.3%)</b> | <b>CD<br/>n=116 (38.7%)</b> | <b>p value</b> |
|--------------------------------------------------------|--------------------------------|-----------------------------|----------------|
| <b>Use of Ramipril within 6 months - Yes (%)</b>       | 20 (10.9%)                     | 14 (12.1%)                  | 0.75           |
| <b>Cumulative dose of Ramipril (mg/kg) - Mean (SD)</b> | 37.6 (170.8)                   | 29.5 (106.4)                | 0.65           |
